# Supplementary material for: Exploring the role of halide mixing in lead-free BZA2SnX4 two dimensional hybrid perovskites
Source: Royal Society of Chemistry journal article supplement (doi:10.1039/c9ta11923j), 2019-12-19
Supplement: c9ta11923j1.pdf [file c9ta11923j1.pdf]

## ELECTRONIC SUPPLEMENTARY INFORMATION

# Exploring the Role of Halide Mixing in Lead-Free BZA<sub>2</sub>SnX<sub>4</sub> Two Dimensional Hybrid Perovskites

*Ambra Pisanu,<sup>a</sup> Mauro Coduri,<sup>a</sup> Marta Morana,<sup>b</sup> Yasemin O. Ciftci<sup>c</sup>, Aurora Rizzo,<sup>d</sup> Andrea Listorti,<sup>e</sup>  
Mattia Gaboardi,<sup>f</sup> Luca Bindi,<sup>g</sup> Valentine I. E. Queloz,<sup>h</sup> Chiara Milanese,<sup>a</sup> Giulia Grancini,<sup>a</sup> Lorenzo  
Malavasi<sup>a,\*</sup>*

<sup>a</sup>Department of Chemistry and INSTM, Viale Taramelli 16, 27100, Pavia, Italy

<sup>b</sup>Department of Earth and Environmental Sciences, Via A. Ferrata 1, 27100, Pavia, Italy

<sup>c</sup>Gazi University, Science Faculty, Physics Department, 06500, Teknikokullar Ankara, Turkey

<sup>d</sup>CNR NANOTEC, Institute of Nanotechnology, c/o Campus Ecotecne, via Monteroni, 73100 Lecce, Italy

<sup>e</sup>Dipartimento di Matematica e Fisica “E. De Giorgi”, Università del Salento, Via per Arnesano, 73100 Lecce, Italy

<sup>f</sup>Elettra - Sincrotrone Trieste S.C.p.A., S.S. 14 km 163.5 in Area Science Park, 34149, Basovizza, Trieste, Italy

<sup>g</sup>Dipartimento di Scienze della Terra, Università degli Studi di Firenze, Via G. La Pira 4, 50121, Firenze, Italy

<sup>h</sup>GMF, Institute of Chemical Sciences and Engineering EPFL VALAIS1951 Sion, Switzerland

**Table 1** - Lattice parameters (Å) and space groups of different compounds studied by single-crystal X-ray diffraction.

|                    | BZA <sub>2</sub> SnI <sub>4</sub> | BZA <sub>2</sub> SnBr <sub>4</sub> | BZA <sub>2</sub> SnCl <sub>4</sub> | BZA <sub>3</sub> Sn(Br <sub>x</sub> I <sub>1-x</sub> ) <sub>5</sub> |
|--------------------|-----------------------------------|------------------------------------|------------------------------------|---------------------------------------------------------------------|
| <i>space group</i> | <i>Pbca</i> (# 61)                | <i>Cmc2<sub>1</sub></i> (# 36)     | <i>Cmc2<sub>1</sub></i> (# 36)     | <i>P2<sub>1</sub>/c</i> (# 14)                                      |
| <i>a</i>           | 9.1105(14)                        | 33.2806(15)                        | 33.505(3)                          | 14.5383(4)                                                          |
| <i>b</i>           | 8.6776(13)                        | 8.1046(4)                          | 7.7784(6)                          | 8.46698(19)                                                         |
| <i>c</i>           | 28.754(6)                         | 8.1036(4)                          | 7.7678(5)                          | 26.2932(6)                                                          |
| <i>β</i>           | 90                                | 90                                 | 90                                 | 105.410(3)                                                          |

**Table 2:** Atomic coordinates in the structure of BZA<sub>2</sub>SnI<sub>4</sub> resolved from single crystal X-ray diffraction.

|    |      | <i>x</i>   | <i>y</i>   | <i>z</i>   | <i>msd</i> (Å <sup>2</sup> ) | <i>s.f.</i> |
|----|------|------------|------------|------------|------------------------------|-------------|
| Sn | Sn1  | 0.5        | 0          | 0.5        | 0.03688(13)                  | 1           |
| I  | I1   | 0.28824(4) | 0.29076(4) | 0.49275(2) | 0.04951(13)                  | 1           |
| I  | I2   | 0.54468(5) | 0.02018(5) | 0.39134(2) | 0.05508(14)                  | 1           |
| N  | N1   | .5804(6)   | 00.4342(7) | 0.4134(2)  | 0.0616(13)                   | 1           |
| C  | C1   | 0.4755(11) | 0.5499(9)  | 0.3934(3)  | 0.076(2)                     | 1           |
| C  | C2   | 0.4428(7)  | 0.5136(7)  | 0.3438(3)  | 0.0547(14)                   | 1           |
| C  | C3   | 0.3334(7)  | 0.4091(10) | 0.3330(3)  | 0.076(2)                     | 1           |
| C  | C4   | 0.2993(9)  | 0.3781(14) | 0.2872(4)  | 0.099(3)                     | 1           |
| C  | C5   | 0.3741(12) | 0.4491(11) | 0.2522(3)  | 0.089(3)                     | 1           |
| C  | C6   | 0.4825(11) | 0.5524(11) | 0.2625(3)  | 0.084(2)                     | 1           |
| C  | C7   | 0.5162(9)  | 0.5835(9)  | 0.3081(3)  | 0.0721(19)                   | 1           |
| H  | H1NA | 0.5471     | 0.3395     | 0.4080     | 0.092                        | 1           |
| H  | H1NB | 0.5884     | 0.4490     | 0.4439     | 0.092                        | 1           |
| H  | H1NC | 0.6680     | 0.4455     | 0.4001     | 0.092                        | 1           |
| H  | H1A  | 0.3851     | 0.5492     | 0.4112     | 0.091                        | 1           |
| H  | H1B  | 0.5179     | 0.6522     | 0.3955     | 0.091                        | 1           |
| H  | H3   | 0.2826     | 0.3595     | 0.3568     | 0.092                        | 1           |
| H  | H4   | 0.2250     | 0.3084     | 0.2802     | 0.119                        | 1           |
| H  | H5   | 0.3515     | 0.4273     | 0.2214     | 0.107                        | 1           |
| H  | H6   | 0.5333     | 0.6016     | 0.2387     | 0.101                        | 1           |
| H  | H7   | 0.5905     | 0.6535     | 0.3148     | 0.087                        | 1           |

**Table 3:** Atomic coordinates in the structure of BZA<sub>2</sub>SnBr<sub>4</sub> resolved from single crystal X-ray diffraction.

|    |      | <i>x</i>   | <i>y</i>   | <i>z</i>   | <i>msd</i> (Å <sup>2</sup> ) | <i>o.f.</i> |
|----|------|------------|------------|------------|------------------------------|-------------|
| Sn | Sn1  | 0.5        | 0.2503(2)  | 0.5221(5)  | 0.0411(2)                    | 1           |
| Br | Br1  | 0.5        | 0.4385(3)  | 0.2085(3)  | 0.0594(7)                    | 1           |
| Br | Br2  | 0.5        | -0.0623(3) | 0.3325(2)  | 0.0524(6)                    | 1           |
| Br | Br3  | 0.41079(3) | 0.2505(4)  | 0.5218(8)  | 0.0738(3)                    | 1           |
| N  | N1   | 0.4224(3)  | 0.1703(19) | 0.0996(14) | 0.067(3)                     | 1           |
| C  | C1   | 0.4012(3)  | 0.291(3)   | -0.003(3)  | 0.080(5)                     | 1           |
| C  | C2   | 0.3569(2)  | 0.258(3)   | 0.011(3)   | 0.081(3)                     | 1           |
| C  | C3   | 0.3352(7)  | 0.136(3)   | -0.068(4)  | 0.122(10)                    | 1           |
| C  | C4   | 0.2938(7)  | 0.129(4)   | -0.047(6)  | 0.185(16)                    | 1           |
| C  | C5   | 0.2748(4)  | 0.238(4)   | 0.060(6)   | 0.190(15)                    | 1           |
| C  | C6   | 0.2968(6)  | 0.357(3)   | 0.143(5)   | 0.159(13)                    | 1           |
| C  | C7   | 0.3380(6)  | 0.364(3)   | 0.119(4)   | 0.111(10)                    | 1           |
| H  | H1NA | 0.4488     | 0.1880     | 0.0930     | 0.101                        | 1           |
| H  | H2NB | 0.4145     | 0.1805     | 0.2040     | 0.101                        | 1           |
| H  | H3NC | 0.41689    | 0.0689     | 0.0640     | 0.101                        | 1           |
| H  | H1A  | 0.4097     | 0.2814     | -0.1169    | 0.096                        | 1           |
| H  | H1B  | 0.4071     | 0.4022     | 0.0347     | 0.096                        | 1           |
| H  | H3   | 0.3482     | 0.0584     | -0.1338    | 0.146                        | 1           |
| H  | H4   | 0.2788     | 0.0521     | -0.1051    | 0.222                        | 1           |
| H  | H5   | 0.2472     | 0.2302     | 0.0757     | 0.228                        | 1           |
| H  | H6   | 0.2841     | 0.4312     | 0.2131     | 0.191                        | 1           |
| H  | H7   | 0.3531     | 0.4414     | 0.1773     | 0.134                        | 1           |

**Table 4:** Atomic coordinates in the structure of BZA<sub>2</sub>SnCl<sub>4</sub> resolved from single crystal X-ray diffraction.

|    |      | <i>x</i>    | <i>y</i>    | <i>z</i>    | <i>msd</i> (Å <sup>2</sup> ) | <i>o.f.</i> |
|----|------|-------------|-------------|-------------|------------------------------|-------------|
| Sn | Sn1  | 0.5         | 0.25148(18) | 0.5294(6)   | 0.0454(2)                    | 1           |
| Cl | Cl1A | 0.5         | 0.4088(18)  | 0.234(3)    | 0.070(4)                     | 0.5         |
| Cl | Cl1B | 0.5         | 0.4675(18)  | 0.181(3)    | 0.070(4)                     | 0.5         |
| Cl | Cl2A | 0.5         | -0.0346(13) | 0.3622(12)  | 0.0384(15)                   | 0.5         |
| Cl | Cl2B | 0.5         | -0.1143(12) | 0.3355(14)  | 0.0384(15)                   | 0.5         |
| Cl | Cl3  | 0.41561(7)  | 0.2558(7)   | 0.5318(18)  | 0.0800(7)                    | 1           |
| N  | N1   | 0.4254(3)   | 0.1832(17)  | 0.1179(13)  | 0.057(2)                     | 1           |
| C  | C1   | 0.4033(3)   | 0.269(2)    | -0.0205(16) | 0.065(4)                     | 1           |
| C  | C2   | 0.35900(19) | 0.2689(16)  | 0.0268(16)  | 0.064(2)                     | 1           |
| C  | C3   | 0.3378(5)   | 0.143(2)    | -0.060(2)   | 0.096(6)                     | 1           |
| C  | C4   | 0.2971(4)   | 0.131(2)    | -0.034(3)   | 0.117(7)                     | 1           |
| C  | C5   | 0.2783(3)   | 0.240(3)    | 0.079(3)    | 0.142(11)                    | 1           |
| C  | C6   | 0.2993(4)   | 0.362(3)    | 0.171(3)    | 0.126(8)                     | 1           |
| C  | C7   | 0.3400(4)   | 0.374(2)    | 0.143(2)    | 0.085(5)                     | 1           |
| H  | H1NA | 0.4200      | 0.2343      | 0.2178      | 0.085                        | 1           |
| H  | H1NB | 0.4514      | 0.1898      | 0.0967      | 0.085                        | 1           |
| H  | H1NC | 0.4181      | 0.0733      | 0.1232      | 0.085                        | 1           |
| H  | H1A  | 0.4073      | 0.2090      | -0.1284     | 0.079                        | 1           |
| H  | H1B  | 0.412689    | 0.38639     | -0.0338     | 0.079                        | 1           |
| H  | H3   | 0.3507      | 0.0683      | -0.1342     | 0.115                        | 1           |
| H  | H4   | 0.048658    | 0.282381    | -0.093367   | 0.140                        | 1           |
| H  | H5   | 0.2509      | 0.2318      | 0.0945      | 0.171                        | 1           |
| H  | H6   | 0.2866      | 0.4344      | 0.2485      | 0.151                        | 1           |
| H  | H7   | 0.3548      | 0.4545      | 0.2036      | 0.102                        | 1           |

**Table 5** - Octahedral interatomic distances in the structure of BZA<sub>2</sub>SnX<sub>4</sub>.

|                   | BZA <sub>2</sub> SnI <sub>4</sub> | BZA <sub>2</sub> SnBr <sub>4</sub> | BZA <sub>2</sub> SnCl <sub>4</sub> |
|-------------------|-----------------------------------|------------------------------------|------------------------------------|
| <i>apical</i>     | 3.1557(9) Å (x 2)                 | 2.977(1) Å (x 2)                   | 2.823(3) Å (x 2)                   |
| <i>equatorial</i> | 3.200(3) Å (x 2)                  | 2.965(4) Å (x 1)                   | 3.015(11) Å (x 1)                  |
|                   |                                   | 2.964(4) Å (x 1)                   | 2.966(11) Å (x 1)                  |
|                   | 3.183(2) Å (x 2)                  | 2.940(4) Å (x 1)                   | 2.743(10) Å (x 1)                  |
|                   |                                   | 2.942(4) Å (x 1)                   | 2.690(11) Å (x 1)                  |

**Table 6** - Sn-X-Sn bond angles within the inorganic layer in the structure of BZA<sub>2</sub>SnX<sub>4</sub>.

|          | BZA <sub>2</sub> SnI <sub>4</sub> | BZA <sub>2</sub> SnBr <sub>4</sub> | BZA <sub>2</sub> SnCl <sub>4</sub> |
|----------|-----------------------------------|------------------------------------|------------------------------------|
| Sn-X1-Sn | 160.57(2)°                        | 151.9(1)°                          | 151.1(4)°                          |
| Sn-X2-Sn | -                                 | 152.4(1)°                          | 144.3(4)°                          |

**Table 7:** Atomic coordinates in the structure of BZA<sub>3</sub>Sn(Br<sub>x</sub>I<sub>1-x</sub>)<sub>5</sub> resolved from single crystal X-ray diffraction.

|    |     | <i>x</i>   | <i>y</i>   | <i>z</i>   | <i>msd</i> (Å <sup>2</sup> ) | <i>s.f.</i> |
|----|-----|------------|------------|------------|------------------------------|-------------|
| Sn | Sn1 | 0.47938(3) | 0.51806(4) | 0.33246(2) | 0.03654(12)                  | 1           |
| I  | I1  | 0.27258(3) | 0.50385(6) | 0.27551(2) | 0.05074(18)                  | 0.705(8)    |
| Br | Br1 |            |            |            |                              | 0.295(8)    |
| I  | I2  | 0.45932(3) | 0.72741(5) | 0.42358(2) | 0.05239(16)                  | 0.927(8)    |
| Br | Br2 |            |            |            |                              | 0.073(8)    |
| I  | I3  | 0.49802(4) | 0.81420(6) | 0.26269(2) | 0.04739(19)                  | 0.314(7)    |
| Br | Br3 |            |            |            |                              | 0.686(7)    |
| I  | I4  | 0.46490(4) | 0.23012(5) | 0.39661(2) | 0.05487(17)                  | 0.853(8)    |
| Br | Br4 |            |            |            |                              | 0.147(8)    |
| I  | I5  | 0.27135(3) | 0.99076(6) | 0.12891(2) | 0.05781(18)                  | 0.986(8)    |
| Br | Br5 |            |            |            |                              | 0.014(8)    |
| N  | N1  | 0.3457(5)  | 0.5863(8)  | 0.1577(2)  | 0.0731(19)                   | 1           |
| C  | C1A | 0.2937(7)  | 0.5070(11) | 0.0342(3)  | 0.085(2)                     | 1           |
| C  | C1B | 0.2582(10) | 0.5466(15) | -0.0181(4) | 0.120(3)                     | 1           |
| C  | C1C | 0.1679(10) | 0.6071(16) | -0.0294(6) | 0.127(4)                     | 1           |
| C  | C1D | 0.1097(10) | 0.6179(18) | 0.0032(5)  | 0.139(4)                     | 1           |
| C  | C1E | 0.1508(9)  | 0.5715(16) | 0.0542(5)  | 0.114(3)                     | 1           |
| C  | C1F | 0.2423(5)  | 0.5138(8)  | 0.0708(3)  | 0.0633(17)                   | 1           |

|   |      |            |            |           |            |   |
|---|------|------------|------------|-----------|------------|---|
| C | C1G  | 0.2817(10) | 0.4691(13) | 0.1250(4) | 0.108(3)   | 1 |
| N | N2   | 0.3153(5)  | 1.0857(8)  | 0.2671(3) | 0.0641(15) | 1 |
| C | C2A  | 0.1629(6)  | 1.0987(11) | 0.3357(3) | 0.071(2)   | 1 |
| C | C2B  | 0.0728(7)  | 1.1210(13) | 0.3411(4) | 0.085(3)   | 1 |
| C | C2C  | -0.0020(6) | 1.0438(12) | 0.3091(4) | 0.080(2)   | 1 |
| C | C2D  | 0.0126(6)  | 0.9447(12) | 0.2716(4) | 0.084(3)   | 1 |
| C | C2E  | 0.1025(6)  | 0.9206(10) | 0.2664(3) | 0.072(2)   | 1 |
| C | C2F  | 0.1796(5)  | 0.9947(8)  | 0.2999(3) | 0.0540(15) | 1 |
| C | C2G  | 0.2796(6)  | 0.9619(9)  | 0.2963(4) | 0.067(2)   | 1 |
| N | N3   | 0.6571(5)  | 0.4662(9)  | 0.4902(3) | 0.0707(18) | 1 |
| C | C3A  | 0.8157(6)  | 0.4753(11) | 0.5982(3) | 0.068(2)   | 1 |
| C | C3B  | 0.9041(7)  | 0.4287(14) | 0.6289(3) | 0.086(3)   | 1 |
| C | C3C  | 0.9836(6)  | 0.4588(13) | 0.6127(4) | 0.083(3)   | 1 |
| C | C3D  | 0.9773(6)  | 0.5376(13) | 0.5660(4) | 0.082(3)   | 1 |
| C | C3E  | 0.8895(6)  | 0.5831(11) | 0.5351(3) | 0.068(2)   | 1 |
| C | C3F  | 0.8080(5)  | 0.5525(9)  | 0.5513(3) | 0.0555(16) | 1 |
| C | C3G  | 0.7133(6)  | 0.6009(11) | 0.5176(3) | 0.071(2)   | 1 |
| H | H1NA | 0.3300     | 0.6824     | 0.1445    | 0.11       | 1 |
| H | H1NB | 0.4057     | 0.5652     | 0.1578    | 0.11       | 1 |
| H | H1NC | 0.3400     | 0.5822     | 0.1906    | 0.11       | 1 |
| H | H1A  | 0.3568     | 0.4735     | 0.0454    | 0.102      | 1 |
| H | H1B  | 0.2922     | 0.5325     | -0.0432   | 0.144      | 1 |
| H | H1C  | 0.1433     | 0.6454     | -0.0635   | 0.153      | 1 |
| H | H1D  | 0.0472     | 0.6538     | -0.0080   | 0.167      | 1 |
| H | H1E  | 0.1151     | 0.5795     | 0.0786    | 0.137      | 1 |
| H | H1G1 | 0.3167     | 0.3711     | 0.1259    | 0.13       | 1 |
| H | H1G2 | 0.2295     | 0.4487     | 0.1407    | 0.13       | 1 |
| H | H2NA | 0.2825     | 1.0789     | 0.2329    | 0.096      | 1 |
| H | H2NB | 0.3777     | 1.0728     | 0.2714    | 0.096      | 1 |
| H | H2NC | 0.3046     | 1.1802     | 0.2792    | 0.096      | 1 |
| H | H2A  | 0.2135     | 1.1556     | 0.3569    | 0.085      | 1 |
| H | H2B  | 0.0629     | 1.1892     | 0.3669    | 0.102      | 1 |
| H | H2C  | -0.0633    | 1.0588     | 0.3128    | 0.096      | 1 |

|   |      |         |        |        |       |   |
|---|------|---------|--------|--------|-------|---|
| H | H2D  | -0.0389 | 0.8927 | 0.2493 | 0.1   | 1 |
| H | H2E  | 0.1118  | 0.8540 | 0.2401 | 0.086 | 1 |
| H | H2G1 | 0.3218  | 0.9541 | 0.3317 | 0.08  | 1 |
| H | H2G2 | 0.2807  | 0.8611 | 0.2789 | 0.08  | 1 |
| H | H3NA | 0.6868  | 0.4234 | 0.4680 | 0.106 | 1 |
| H | H3NB | 0.5996  | 0.4997 | 0.4723 | 0.106 | 1 |
| H | H3NC | 0.6511  | 0.3943 | 0.5138 | 0.106 | 1 |
| H | H3A  | 0.7613  | 0.4543 | 0.6092 | 0.081 | 1 |
| H | H3B  | 0.9092  | 0.3768 | 0.6607 | 0.103 | 1 |
| H | H3C  | 1.0429  | 0.4258 | 0.6332 | 0.1   | 1 |
| H | H3D  | 1.0321  | 0.5598 | 0.5555 | 0.098 | 1 |
| H | H3E  | 0.8848  | 0.6345 | 0.5032 | 0.082 | 1 |
| H | H3G1 | 0.6779  | 0.6529 | 0.5393 | 0.085 | 1 |
| H | H3G2 | 0.7223  | 0.6765 | 0.4916 | 0.085 | 1 |

**Table 8** - Lattice parameters of the  $\text{BZA}_2\text{Sn}(\text{Br}_x\text{I}_{1-x})_4$  solid solution from powder X-ray diffraction in the same setting (see main text for details).

| $x$   | $a$       | $b$       | $c$       |
|-------|-----------|-----------|-----------|
| 1.0   | 8.1007(6) | 8.0993(8) | 33.287(3) |
| 0.75  | 8.2367(9) | 8.2318(9) | 32.207(5) |
| 0.625 | 8.297(2)  | 8.290(1)  | 32.056(5) |
| 0.50  | 8.285(8)  | 8.268(8)  | 32.184(7) |
| 0.30  | 8.584(4)  | 8.496(3)  | 31.524(8) |
| 0.25  | 8.660(3)  | 8.532(3)  | 31.166(9) |
| 0.0   | 9.101(1)  | 8.680(1)  | 28.802(3) |

**Table 9** – Elemental composition of some selected samples probed by EDX, where  $x$  refers to  $\text{BZA}_2\text{Sn}(\text{Br}_x\text{I}_{1-x})_4$  composition and X/Sn indicates the halide to Sn ratio, which is 4 for a full 2D composition. E.s.d. for the measurements is around 5%.

| nominal<br>$x$ | exp $x$ | exp<br>X/Sn |
|----------------|---------|-------------|
| 1.000          | -       | 3.90        |
| 0.750          | 0.753   | 4.10        |
| 0.625          | 0.636   | 4.14        |
| 0.250          | 0.275   | 4.09        |
| 0.000          | -       | 3.96        |

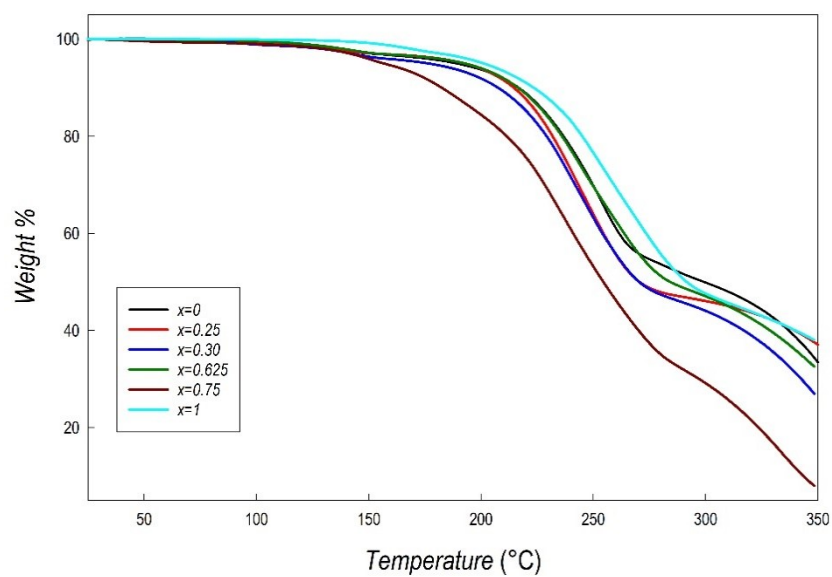

**Figure S1.** TGA traces for the  $\text{BZA}_2\text{Sn}(\text{Br}_x\text{I}_{1-x})_4$  solid solution as a function of  $x$  in the range from RT to 350°C.

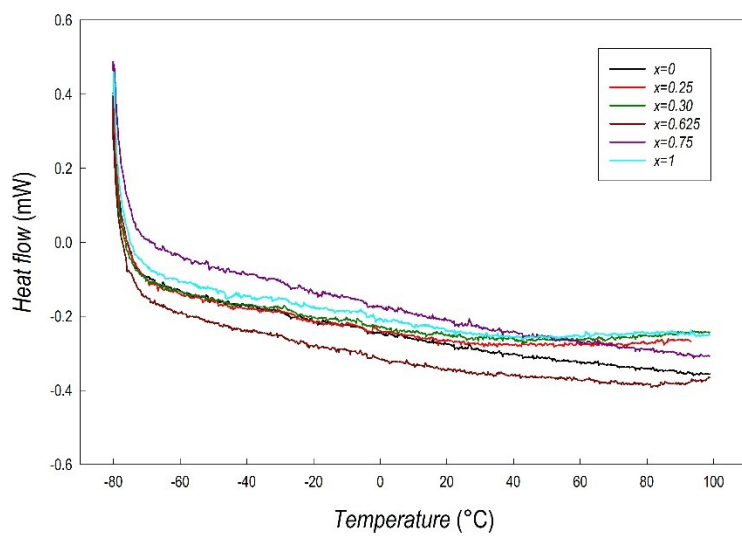

**Figure S2.** DSC traces for the  $\text{BZA}_2\text{Sn}(\text{Br}_x\text{I}_{1-x})_4$  solid solution as a function of  $x$  in the range from -80°C to 100°C.



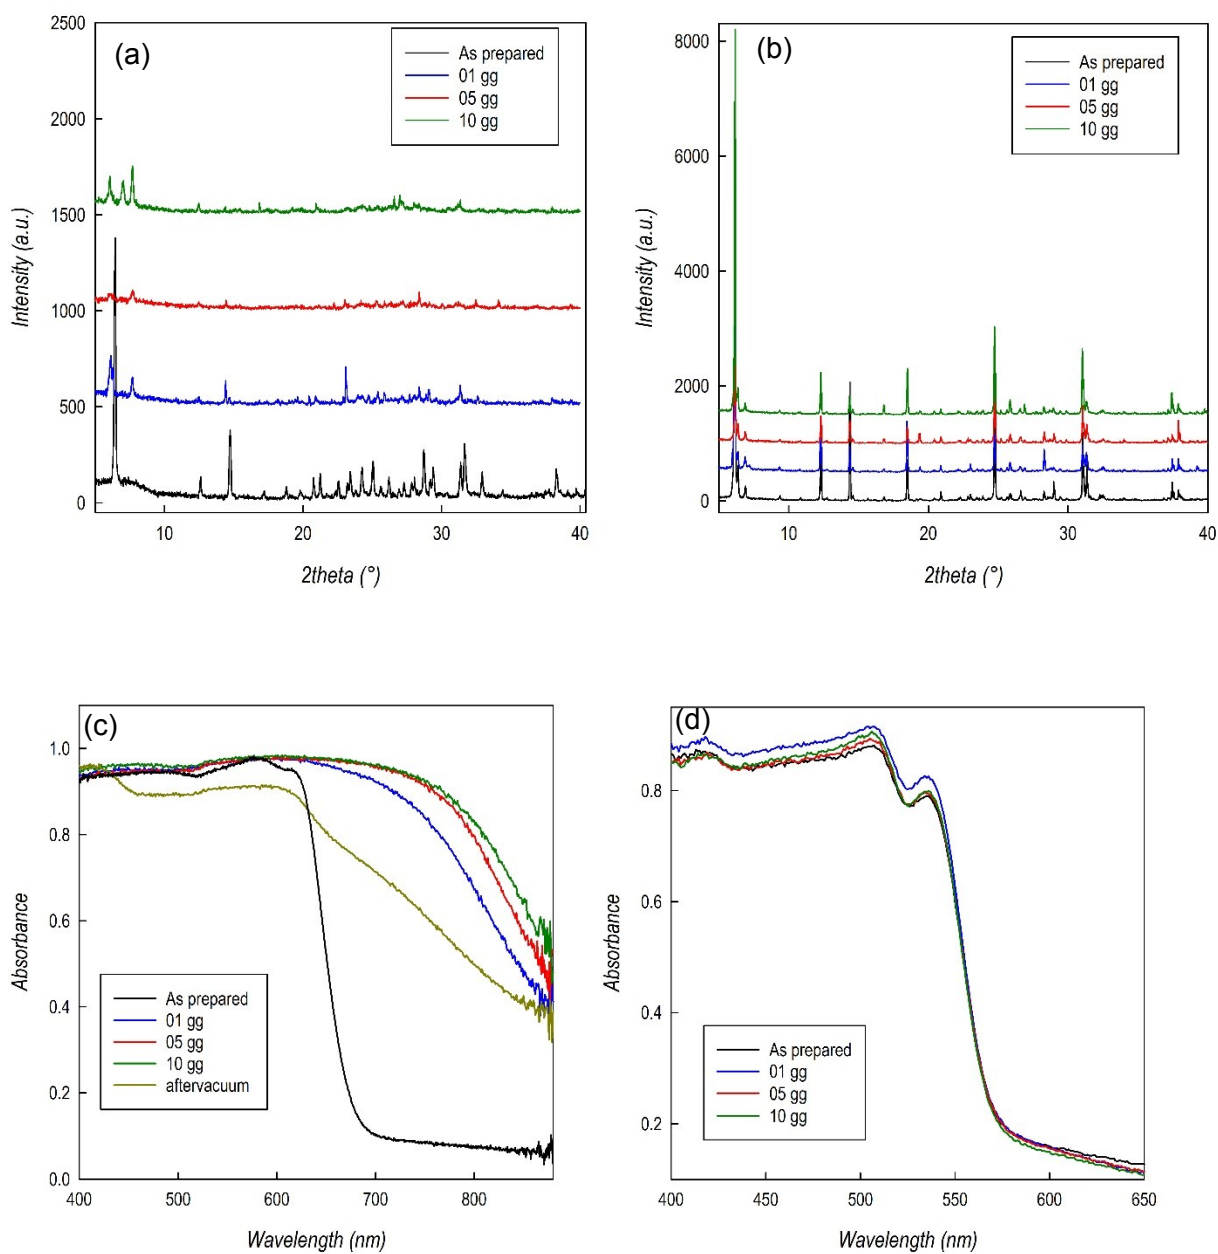

**Figure S3.** XRD patterns of BZA<sub>2</sub>SnI<sub>4</sub> (a) and BZA<sub>2</sub>PbI<sub>4</sub> (b) as a function of time under laboratory-air exposure and UV-Vis spectra of BZA<sub>2</sub>SnI<sub>4</sub> (c) and BZA<sub>2</sub>PbI<sub>4</sub> (d) as a function of time under laboratory-air exposure.

**Table 10** - Optimized lattice parameters for  $\text{BZA}_2\text{SnX}_4$  ( $\text{X}=\text{Cl}$ ,  $\text{Br}$ , and  $\text{I}$ ) with experimental values

| Composition                        | $a$ (Å)     | $b$ (Å)    | $c$ (Å)   |
|------------------------------------|-------------|------------|-----------|
| $\text{BZA}_2\text{SnI}_4$ Theory  | 9.317       | 8.867      | 30.3618   |
| Exp.                               | 9.1105(14)  | 8.6776(13) | 28.754    |
| Error %                            | 2.26        | 2.18       | 5.59      |
| $\text{BZA}_2\text{SnBr}_4$ Theory | 33.979      | 8.111      | 8.0226    |
| Exp.                               | 33.2806(15) | 8.1046(4)  | 8.1036(4) |
| Error %                            | 2.09        | 0.08       | 0.99      |
| $\text{BZA}_2\text{SnCl}_4$ Theory | 34.68       | 8.1139     | 7.873     |
| Exp.                               | 33.505(3)   | 7.7784(6)  | 7.7678(5) |
| Error %                            | 3.4         | 4.1        | 1.33      |

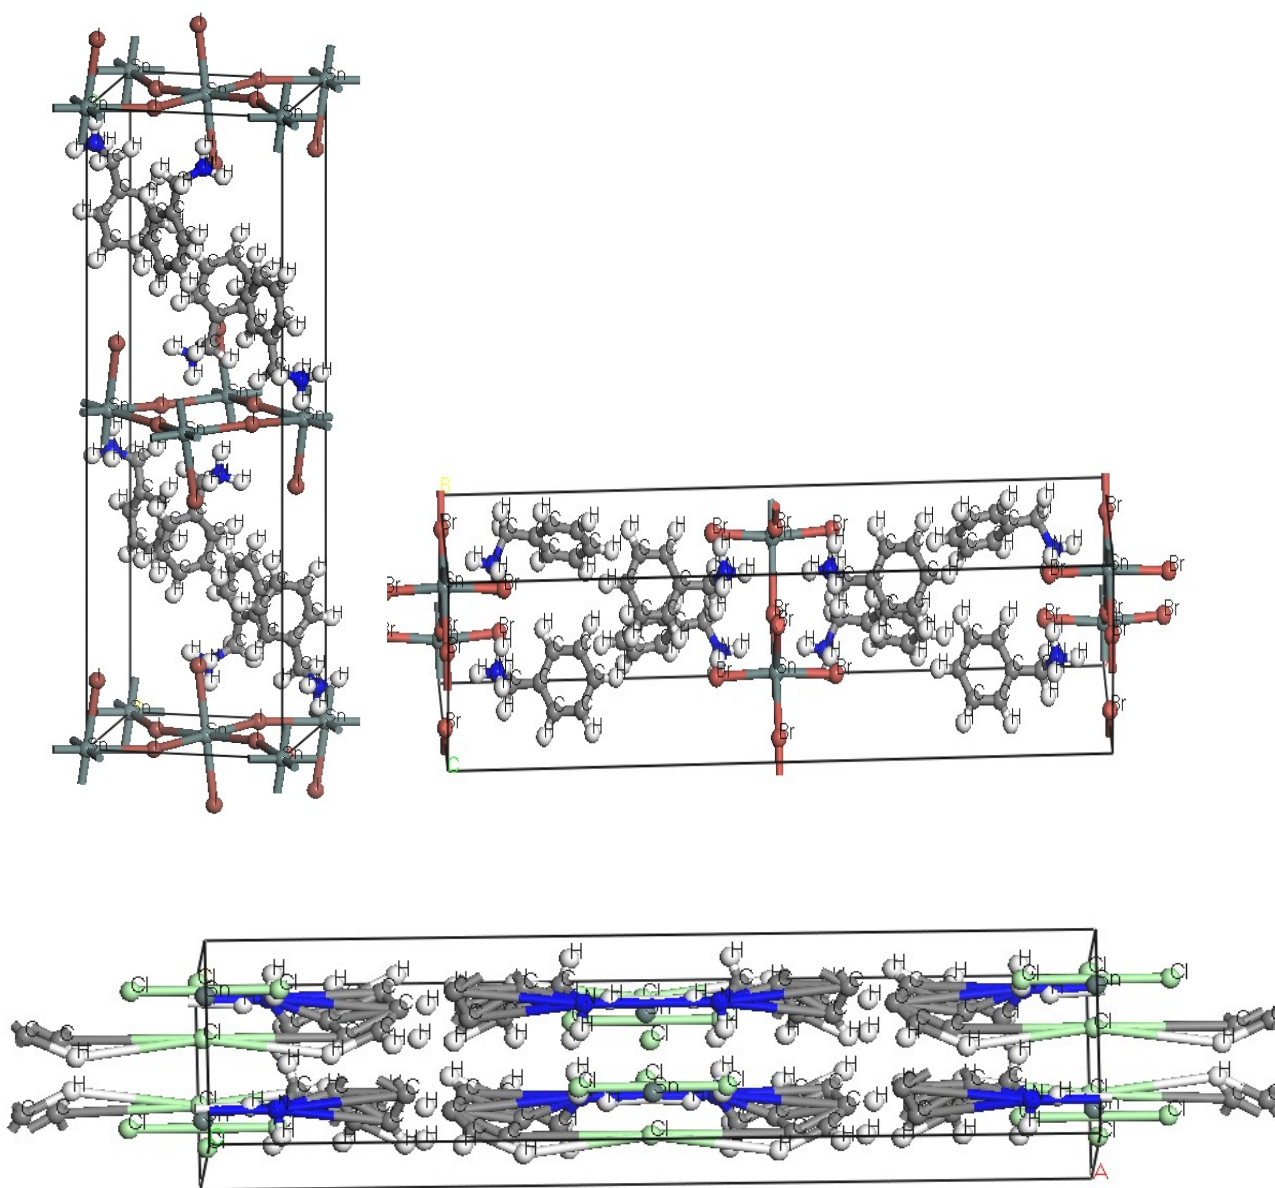

**Figure S4.** Optimized unit cell for  $\text{BZA}_2\text{SnX}_4$  ( $\text{X}=\text{I}$ ,  $\text{Br}$ , and  $\text{Cl}$ )

**Table 11.** Optimized unit cell for  $BZA_2SnX_4$  (X=I, Br, and Cl)

| <b>x</b>      | <b>a1</b> | <b>t1 (ns)</b> | <b>a2</b> | <b>t2 (ns)</b> |
|---------------|-----------|----------------|-----------|----------------|
| 0             | 2,30E-02  | 1,50E+02       | 7,5       | 0,011          |
| 0,25          | 2,90E-02  | 240            | 13        | 0,011          |
| 0,3           | 3,40E-02  | 250            | 22        | 0,02           |
| 0,625         | 4,90E-02  | 240            | 16        | 0,012          |
| 0,75          | 2,40E-02  | 240            | 16        | 0,011          |
| 1             | 1,00E-02  | 230            | 27        | 0,01           |
| $BZA_2SnCl_4$ | 1.61-2    | 120            | 44        | 0,0099         |
